# Supplementary material
Source: PubMed Central journal article supplement (PMC3091803)
Supplement: supp_mcr034_mcr034supp_fig1.pdf [file supp_mcr034_mcr034supp_fig1.pdf]

# SUPPLEMENTARY DATA 1

FIG. S1. Alignment of the core CID regions from the 93 unique protein sequences and signature consensus according to the criteria of Joshi *et al.* (1997).

|                 |                         |         |                     |      |            |
|-----------------|-------------------------|---------|---------------------|------|------------|
| ArathICK1/KRP1  | MPTSESEIEDFFVEAEKQLKEK  | -----   | EKKKYNFD FEKEKPLEG  | ---- | RYEWWKLE-  |
| ArathICK2/KRP2  | TVKEAELEDFFQVAEKDLRNK   | --LLECS | SMKYNFD FEKDEPLGG   | ---- | RYEWWKLN   |
| ArathICK6/KRP3  | IPTTSEMEEFFAYAEQQQRL    |         | FMEKYNFD IVNDIPLSG  | ---- | RYEWWQVKP  |
| ArathICK7/KRP4  | RPTTPEMDEFFSGAEEEQQQKQ  | ----    | FIEKYNFD PVNEQPLPG  | ---- | RFEWTKVDD  |
| ArathICK3/KRP5  | KSIQSEIIEDFFASAEQQQRF   | ----    | FIQKYNFD IVSDNPLPG  | ---- | RYEWWKVMP  |
| ArathICK4/KRP6  | TPTAAEIEDLFSLELSQDDKKKQ | ----    | FIEKYNFD IVNDEPLEG  | ---- | RYKWDRL--  |
| ArathICK5/KRP7  | SPTQAELEDDFFSAAERYEQKR  | ----    | FTEKYNFD IVNDIPLSG  | ---- | RYQWVSLKP  |
| MedtrTC102985   | TPTTNEVDEFFALAEKQQQAL   | ----    | FMEKYNFD VVNDVPLPG  | ---- | RYEWWPVLH  |
| MedtrCB894939   | IPISEPFEEYFAKHEAEQORE   | ----    | FMEKYNFD PVTEQPLPG  | ---- | RFEWEKVSF  |
| MedtrKRPMT      | IPISREFEEFCAKHEAEQORE   | ----    | FMEKYNFD PVTEQPLPG  | ---- | RYEWEKVSF  |
| GosarTC39505    | MPTAELEEEFFAPAEKKLQKQ   | ----    | FADKYNFD TVQDEPLEG  | ---- | RYEWWRLKP  |
| GosarTC36522    | VPSTQEMEEFFVYAEQQQHRR   | ----    | FIEKYNFD IVNDLPLQG  | ---- | RYDWVKIIP  |
| GosarTC30716    | IPSQAEIIDEFFSVAEKYEQKR  | ----    | FAEKYNFD IVKDVPLDG  | ---- | RYQWLRILKP |
| Goshi :DT571795 | IPTSHEMDEFFTLAEVDQQRQ   | ----    | FIEKYNFD PVKDKPLPG  | ---- | RYQWEKVDP  |
| LacsaDW054560   | MPSAQEIEVFFARHAHEQQR    | ----    | FSXKYNFD IVNEKPLEG  | ---- | RYEWWKVQP  |
| LacpeDW085493   | IPSTNEMDEFFTQPEKHQQKL   | ----    | FMEKYNFD PVKENPLKG  | ---- | RYEWLKVED  |
| LacpeDW087080   | IPTTLEMEEFFTEPEKQQQKL   | ----    | FIEKYNFD PVNDKPLPG  | ---- | RYQWVKMDN  |
| LacpeDW085482   | FPTAAEIDDDFFVVAEKKEQKR  | ----    | FADKYNFD IVNDVPMEG  | ---- | RYQWVRLKP  |
| SoltuTC129555   | MPSEAELEDEFFAAAEKDLHKK  | ----    | FAEKYNFD FAKKEPLEG  | ---- | RYEWWRVQ-- |
| SoltuTC126156   | IPTTHEMNDFFAGTEEKQQKQ   | ----    | FIEKYNFD PVNDKPLPG  | ---- | RYKWWKQVDR |
| SoltuTC114843   | IPTDLEIIDEFFTRAKEQQRK   | ----    | FIEKYNFD PVNDKPLPG  | ---- | RYEWLKVYS  |
| SoltuCV492391   | IPSAHEIEEFFFFAEQQQRL    | ----    | FMEKYNFD VVNDVPLSG  | ---- | RYEWIRVNH  |
| NicsyKIS1       | MPSEKEIIEDFFAVRQKAI FKR | ----    | FREKYNFD FEKEEPSEG  | ---- | RYEWWRIGS  |
| NctrKIS1a       | MPSEKEIEEFFFARQKAILKR   | ----    | FRKKYNFD FEKEEPLEG  | ---- | RYEWWRIGS  |
| NictoKIS2       | MPSETDLEEFFAAAEKDILKR   | ----    | FTKKYNFD FVKEEPLSG  | ---- | HYEWWRSTV  |
| NictaDW003665   | MPSEKEIIEDFFAVRQKAI FKR | ----    | FREKYNFD FEKEEPLEG  | ---- | RYEWWRIGS  |
| NictaDV161051   | VPSEAEIEEFFFVAEKREQKR   | ----    | FAEKYNFD IAKDVPLKG  | ---- | RYQWVSLKP  |
| SollyKRP1       | IPTDLEMEEFFTRAKEQQRK    | ----    | FIEKYNFD PVNEKPLPG  | ---- | RYEWWKVNH  |
| SollyKRP2       | IPSAHEIIEEFFFFAEQQQRL   | ----    | FMDKYNFD VVNDVPLSG  | ---- | RYEWIRVNH  |
| GlymaCKI11      | MPTELELEEEFFAAAEKDIQKR  | ----    | FQDRYNFD IVKDVPLEG  | ---- | RYEWWQLKP  |
| GlymaCKI12      | MPTELELEEEFFVAEKDIQKR   | ----    | FQDKYNFD IVKDVPLEG  | ---- | RYEWWQLKP  |
| GlymaCKI21      | MPTELELEDEFFAAAEKDIRKR  | ----    | FSDKYNFD IVKGVSLSG  | ---- | RYEWWKLE-- |
| GlymaCKI22      | VPTSESELEDFFAAAEKDIQKR  | ----    | FTDKYNFD FVKDMPLEG  | ---- | RYEWWQL--  |
| GlymaTC209994   | TTPKAEIEEFFFMAAEKYEQKR  | ----    | FTEKYNFD IVRDIPLEG  | ---- | RYQWVRLH-  |
| GlymaTC231727   | IPTSREMDEFFFAEIEEAQQKK  | ----    | FIEKYNFD PVNEKPLSG  | ---- | RYEWEKLLKP |
| VitviTC39855    | MPSESELEEFFAAAEKDVQKR   | ----    | FSEKYNFD IVKDVPMEG  | ---- | RYEWWRLKP  |
| VitriCO408372   | MPSTVEIEEFFFSAAEKYQQQR  | ----    | FAEKYNFD IVKDAPMEG  | ---- | RYQWVRLER  |
| Eupes DV137303  | IPTSHEMEEFFTYAEQEQQRL   | ----    | FIEKYNFD IVNELPLSG  | ---- | RYEWWQVIP  |
| EupesKRP4       | IPTAHEMDQFFAKAEQEQRQ    | ----    | FMENYNFD PVNEKPLPG  | ---- | RYEWEKLDP  |
| PissaCKI        | TPTHEYELEEFFAAAEKDIQKK  | ----    | FQEKYNFD IILKDVPLEG | ---- | RYEWWQLKP  |
| CheruCDKI1      | MPSDSEIEEFFFVAEKDLQKR   | ----    | FSEKYNFD IVKDVPLKG  | ---- | RYDWVPINP  |
| AquTC17730      | IPTTQEMEEFFAGAEQQQRI    | ----    | FAEKYNFD PVNDSPLPG  | ---- | RYEWEERVNP |
| BetvuTC444      | MPSDSEIEEFFFSTA EKDLHKK | ----    | FSDKYNFD IVNDVPLNG  | ---- | RYEWWPLQP  |
| PethyEST884434  | MPSEIIELEDEFFVAEKDLHKK  | ----    | FVQKYNFD FVDAEPLKG  | ---- | SYEWWRL--  |
| PhavuBQ481784   | EPPKAEIEEFFFVAEKYEQKR   | ----    | FVEKYNFD IGRDMPLEG  | ---- | RYQWVRLH-  |
| PoptrKRP2       | RITDEEVEKFFCEIEKTVPQR   | ----    | FKDKYNFD FDKDEALEG  | ---- | RYEWWRLNP  |
| PopeuTC43100    | RITDEEVEKFFCEIEKTVPQR   | ----    | FKDKYNFD FDKDEALEG  | ---- | RYEWWRLNP  |
| PoptrKRP1       | RIADEEIEKFFGEIQKNIPQC   | ----    | FKDKYNFD FDKDEPLEG  | ---- | RYEWARLNP  |
| PopTC37787      | RITDEEIEKFFGEIQKNIPQC   | ----    | FKDKYNFD FDKDEPLEG  | ---- | RYEWARLNP  |
| PoptrKRP4       | IPTTREMDEFFGPAEEELRQ    | ----    | FTEKYNFD PVSDKPLPG  | ---- | RYEWEKLDP  |
| PopTC23987      | IPTTREMDEFFGPAEEELRQ    | ----    | FTEKYNFD PVSDKPLPG  | ---- | RYEWEKLDP  |
| PoptrKRP5       | IPTAHEMDEFFGPAEEELRQ    | ----    | FTEKYNFD PVSDKPLHG  | ---- | RYEWEKLDL  |
| PopdeTC22599    | IPTAHEMDEFFGPAEEELRQ    | ----    | FTEKYNFD PVSDKPLHG  | ---- | RYEWEKLDL  |
| PoptrKRP3       | IPTTCMDEFFAGVEQQQRL     | ----    | FIEKYNFD IVNDLPLSG  | ---- | RYEWWRVIP  |
| PoptrTC41878    | YPDNMEMDEFFAGVEQQQRL    | ----    | FIEKYNFD IVNDLPLSG  | ---- | RYEWWRVIP  |
| PoptrKRP6       | MPSQAEIDAFFTAGAEREEQRR  | ----    | FAEKYNFD VVMDLPMEG  | ---- | RYQWICLKP  |
| PoptrKRP7       | MPSQAEIDAFFTAGAEREEQKR  | ----    | FAEKYNFD VVMDLPMEG  | ---- | RYQWICLKP  |
| PicglTC9046     | VPTTNEIIEEFFFAGAEQQEQRR | ----    | FTDRYNFD PVSDSPLPG  | ---- | RFEWVRLRP  |

|                |                         |       |                       |      |            |
|----------------|-------------------------|-------|-----------------------|------|------------|
| PintaTC61074   | APTLDELEDFFAAAEAREQKR   | ----- | FTERYNYDPVSDLPLSG     | ---- | RYEWERLLP  |
| pontrCD574460  | MPAKSEIIEDFFAAEKKLVKQ   | ----- | FSQKYNFDFVKEEPMEG     | ---- | RYKWVGLRP  |
| Citsi:DN134829 | MPAKSEIIEDFFAAEKKLVKQ   | ----- | FSQKYNFDFVKEEPMEG     | ---- | RYKWVGLRP  |
| CitsiCX674730  | IPSAAEIIEFFTAAEKREQER   | ----- | FAEKYNYDIVNDLPLEG     | ---- | RYQWVRLNE  |
| IponiCJ753702  | MPSAAEIEEEFFSAAEKYEQER  | ----- | FKQKYNFDVVKDVPLEG     | ---- | RYEWWPLKP  |
| MaldoCN912198  | VVNASELEEEFFAAMEKESQOK  | ----- | FKEMYNFDVAKDEPHEG     | ---- | RYEWWRLKP  |
| TarkoDR402922  | LPTAAEIEDEFFSVAEKKEQKR  | ----- | FTDKYNFDFVNDAPMEG     | ---- | RYQWVRLKP  |
| FraveCX661375  | IPTAHDMDEFFAGAEQKQKQ    | ----- | FIDKYNFDFVNDKPLPG     | ---- | RYEWEKLDP  |
| OrysaKRP1      | ---AAEIEAFFFAAAEEAEAKR  | ----- | FAAKYNFDVVRGVPLDAG    | ---- | RFEWTPVVS  |
| OrysaKRP2      | -AAAAEIEEFLAAAERSEAER   | ----- | FAAKYNFDVVRGVPLDAGGAG | ---- | RFEWTAVGS  |
| OrysaKRP3      | ---EAEIEAFFFAAAELAERRR  | ----- | FAEKYNYDIALDRPLQG     | ---- | RYEWEPTVP  |
| OrysaKRP4      | IPASAELEAFFFAAEEQRQRQA  | ----- | FIDKYNFDFVNDCLPLG     | ---- | RFEWWKLD-  |
| OrysaKRP5      | VPSSLEMEEFFFAAAEQQHQA   | ----- | FRERYNFCPVNDCLPLG     | ---- | RYEWTRLDC  |
| OrysaKRP6      | ---EEEVEAFLAAAESSVARR   | ----- | FAAKYNYDIVKDAPMDG     | ---- | RYEWWRVRP  |
| ZeamaKRP1      | VPSSREMNEYFAAEQRRQQD    | ----- | FIDKYNFDPANDCLPLG     | ---- | RFEWWKLD-  |
| ZeamaKRP2      | ---AHEIQEFFFFAAAEAAQAKR | ----- | FASKYNFDFVVRGVPLDAGG  | ---- | RFEWWAPVVS |
| ZeamaTC306014  | IPSSLEMEEFFSAAEQQECHS   | ----- | FREKYNFCPVNDCLPLG     | ---- | RYEWARLDC  |
| ZeamaTC306015  | IPSSLEMEEFFSAAEQQECHN   | ----- | FREKYNFCPVNDCLPLG     | ---- | RYEWARLDC  |
| ZeamaTC292391  | ---AQEIQEFFFFAAAEAAHAKR | ----- | FASKYNFDFVVRGVPLDAG   | ---- | RFEWTTPGVS |
| ZeamaCF636654  | ---AAEVEAFLAAAERGMARR   | ----- | FAVKYNVDIVKDAPMDGG    | ---- | RYEWWRVRP  |
| ZeamaKRP4      | IPSSSTEMNEY-FAAEQRRQQQA | ----- | FIDKYNFDFVNDCLPLG     | ---- | RFEWWKLD-  |
| TriaeTC255455  | IPCSAEMNEFFSAAEQPQQQA   | ----- | FIDKYNFDFVNDCLPLG     | ---- | RYEWWKLD-  |
| TriaeTC257918  | ---AAEIEDEFFFAAAEKAQAER | ----- | FAAKYNFDVARGVPLNA     | ---- | GRFEWTPVAT |
| SorbiTC105178  | IPSSHEMEEFFSAAEKQEQQS   | ----- | FREKYNFCPVNDCLPLG     | ---- | RYEWARLDC  |
| SorbiTC106554  | ---AQEIEEFFFFAAAEAAQAKR | ----- | FASKYNFDFVVRGVPLEAGG  | ---- | RFEWTPVVS  |
| SorbiBG240420  | ---AAEVEAFLAAAESGMARR   | ----- | FAAKYNYDVVKDAPMDG     | ---- | RYEWWRVGP  |
| AgrcaDV852835  | ---PEEVEAFFFAAAESGVARR  | ----- | FAAKYNYDVVEDAPMDG     | ---- | RYEWWRVRP  |
| SacofCA111761  | ---AAEVEAFLAAAESGMARR   | ----- | FAAKYNYDVVKDAPMDG     | ---- | RYEWWRMGP  |
| SacofCA113287  | ---AAEVDAAFLAASESGMARR  | ----- | FASKYNYDVVKDAPMDG     | ---- | RYEWWRMGA  |
| OrysaICK1      | ---AAEIEAFFFAAAEEAEAKR  | ----- | FAAKYNFDVVRGVPLDAG    | ---- | RFEWTPVVS  |
| OrysaICK2      | -AAAAEIEEFLAAAERSEAER   | ----- | FAAKYNFDVVRGVPLDAGGAG | ---- | RFEWTARFD  |
| OrysaICK3      | ---EAEIEAFFFAAAELAERRR  | ----- | FAEKYNYDIALDRPLQG     | ---- | RYEWEPTVP  |
| OrysaICK4      | ---EEEVEAFLAAAESSVARR   | ----- | FAAKYNYDIVKDAPMDG     | ---- | RYEWWRVRP  |
| OrysaICK5      | VPSSLEMEEFFFAAAEQQHQA   | ----- | FRERYNFCPVNDCLPLG     | ---- | RYEWTRLDC  |
| OrysaICK6      | IPASAELEAFFFAAEEQRQRQA  | ----- | FIDKYNFDFVNDCLPLG     | ---- | RFEWWKLD-  |

Signature:           xxxxxEiEEFFFAaAEkxqQkr-----FxEKYNFDxVxDxPLxG----RYEWWrlxx
