# Supplementary material
Source: PubMed Central journal article supplement (PMC3091803)
Supplement: supp_mcr034_mcr034supp_table2.pdf [file supp_mcr034_mcr034supp_table2.pdf]

## SUPPLEMENTARY DATA

TABLE S2. List of cDNAs encoding ICK/KRP proteins used in this study, and manually corrected sequences

| Plant species                  | Name <sup>a</sup>            | Accession number(s) for the cDNA                                            | Sources <sup>b</sup> |
|--------------------------------|------------------------------|-----------------------------------------------------------------------------|----------------------|
| <i>Arabidopsis thaliana</i>    | <i>Arath</i> ;ICK1/KRP1      | U94772, BP844999, BP849893                                                  | TAIR <sup>1</sup>    |
|                                | <i>Arath</i> ;ICK2/KRP2      | CK118878, CF773464                                                          | TAIR <sup>2</sup>    |
|                                | <i>Arath</i> ;ICK3/KRP5      | AU237320, AU228360                                                          | TAIR <sup>3</sup>    |
|                                | <i>Arath</i> ;ICK4/KRP6      | AU237797, AU228889                                                          | TAIR <sup>3</sup>    |
|                                | <i>Arath</i> ;ICK5/KRP7      | NM_103850                                                                   | TAIR <sup>3</sup>    |
|                                | <i>Arath</i> ;ICK6/KRP3      | BT025290                                                                    | TAIR <sup>3</sup>    |
|                                | <i>Arath</i> ;ICK7/KRP4      | AU238423, BX835336                                                          | TAIR <sup>3</sup>    |
| <i>Aquilegia sp</i>            | <i>Aqu</i> ;TC17730          | TC17730, TC6497                                                             | TIGR                 |
| <i>Beta vulgaris</i>           | <i>Betvu</i> ;TC444          | TC444                                                                       | TIGR                 |
| <i>Brachypodium distachyon</i> | <i>Bradi</i> ;ICK1           | Bradi3g58107                                                                | MIPs <sup>4</sup>    |
|                                | <i>Bradi</i> ;ICK2           | Bradi1g45985                                                                | MIPs <sup>4</sup>    |
|                                | <i>Bradi</i> ;ICK3           | Bradi4g13680                                                                | MIPs <sup>4</sup>    |
|                                | <i>Bradi</i> ;ICK4           | Bradi4g32265                                                                | MIPs <sup>4</sup>    |
|                                | <i>Bradi</i> ;ICK5           | Bradi1g75877                                                                | MIPs <sup>4</sup>    |
|                                | <i>Bradi</i> ;ICK6           | Bradi1g75887                                                                | MIPs <sup>4</sup>    |
|                                | <i>Bradi</i> ;ICK7           | Bradi3g28507                                                                | MIPs <sup>4</sup>    |
| <i>Brassica napus</i>          | <i>Brana</i> ;TC4200         | TC4200                                                                      | TIGR                 |
| <i>Agrostis capillaris</i>     | <b><i>Agrca</i>;DV852835</b> | DV852835                                                                    | PGDB                 |
| <i>Chenopodium rubrum</i>      | <i>Cheru</i> ;CDK11          | O48597                                                                      | NCBI                 |
| <i>Citrus sinensis</i>         | <i>Citsi</i> ;DN134829       | DN134829                                                                    | PGDB                 |
|                                | <i>Citsi</i> ;CX674730       | CX674730                                                                    | PGDB                 |
| <i>Euphorbia esula</i>         | <i>Eupes</i> ;KRP4           | AY823269, AY823269                                                          | TAIR                 |
|                                | <i>Eupes</i> ;DV137303       | DV137303                                                                    | PGDB                 |
| <i>Fragaria vesca</i>          | <i>Frave</i> ;CX661375       | CX661375                                                                    | PGDB                 |
| <i>Glycine max</i>             | <i>Glyma</i> ;CKI1;1         | Q6T2Z3, TC207407, TC29328, TC32747                                          | NCBI                 |
|                                | <i>Glyma</i> ;CKI1;2         | Q6T2Z2, TC207408                                                            | NCBI                 |
|                                | <i>Glyma</i> ;CKI2;1         | Q6T2Z1, TC207864, TC103910, TC138816, TC166272, TC181833, TC77458, TC84008  | NCBI                 |
|                                | <i>Glyma</i> ;CKI2;2         | Q6T2Z0, TC207863, TC166273, TC181834                                        | NCBI                 |
|                                | <i>Glyma</i> ;TC209994       | TC209994, TC115851, TC127935, TC169616, TC199486, TC48622, TC65488, TC84624 | TIGR                 |
|                                | <i>Glyma</i> ;TC231727       | TC231727, TC141624, TC171132, TC200015                                      | TIGR                 |
| <i>Gossypium arboreum</i>      | <i>Gosar</i> ;TC39505        | TC39505                                                                     | TIGR                 |
|                                | <b><i>Gosar</i>;TC36522</b>  | TC36522                                                                     | TIGR                 |
|                                | <i>Gosar</i> ;TC30716        | TC30716, TC12939, TC1525, TC19237, TC22889, TC4674                          | TIGR                 |
| <i>Gossypium hirsutum</i>      | <i>Goshi</i> ;DT571795       | DT571795                                                                    | PGDB                 |
| <i>Ipomoea nil</i>             | <i>Iponi</i> ;CJ753702       | CJ753702                                                                    | PGDB                 |
| <i>Lactuca perennis</i>        | <i>Lacpe</i> ;DW085493       | DW085493                                                                    | PGDB                 |
|                                | <i>Lacpe</i> ;DW087080       | DW087080                                                                    | PGDB                 |
|                                | <i>Lacpe</i> ;DW085482       | DW085482                                                                    | PGDB                 |
| <i>Lactuca saligna</i>         | <i>Lacsa</i> ;DW054560       | DW054560                                                                    | PGDB                 |
| <i>Solanum lycopersicum</i>    | <i>Solly</i> ;KRP1           | Q8GT29                                                                      | NCBI <sup>5</sup>    |
|                                | <i>Solly</i> ;KRP2           | Q8GT28, TC157790, TC110809, TC139690, TC71277, TC75899, TC89097             | NCBI <sup>5</sup>    |
| <i>Malus x domestica</i>       | <i>Maldo</i> ;CN912198       | CN912198                                                                    | PGDB                 |
| <i>Medicago truncatula</i>     | <i>Medtr</i> ;TC102985       | TC102985                                                                    | TIGR                 |
|                                | <b><i>Medtr</i>;CB894939</b> | CB894939                                                                    | TIGR                 |
|                                | <i>Medtr</i> ;KRPMT          | DQ093069                                                                    | NCBI <sup>6</sup>    |
| <i>Nicotiana glauca</i>        | <i>Nicsy</i> ;KIS1           | CAC82732, NSY297905, AJ297905                                               | NCBI <sup>7</sup>    |
| <i>Nicotiana tabacum</i>       | <i>Nicta</i> ;DW003665       | DW003665                                                                    | PGDB                 |
|                                | <i>Nicta</i> ;DV161051       | DV161051                                                                    | PGDB                 |

|                                                  |                         |                                                                                                            |                    |
|--------------------------------------------------|-------------------------|------------------------------------------------------------------------------------------------------------|--------------------|
|                                                  | <i>Nicta</i> ;KIS2      | NP916714, AJ517189, CAD56868                                                                               | NCBI <sup>7</sup>  |
| <i>Nicotiana tomentosiformis</i>                 | <i>Nictr</i> ;KIS1a     | CAC82731, AJ297904, CAC82733, AJ297906                                                                     | NCBI <sup>8</sup>  |
| <i>Oryza sativa</i><br>(subsp. <i>indica</i> )   | <i>Orysa</i> ;ICK1      | IBCD008058                                                                                                 | BGI                |
|                                                  | <i>Orysa</i> ;ICK2      | IBCD019818                                                                                                 | BGI                |
|                                                  | <i>Orysa</i> ;ICK3      | IBCD008789                                                                                                 | BGI                |
|                                                  | <i>Orysa</i> ;ICK4      | IBCD028812                                                                                                 | BGI                |
|                                                  | <i>Orysa</i> ;ICK5      | IBCD008803                                                                                                 | BGI                |
|                                                  | <i>Orysa</i> ;ICK6      | IBCD030935                                                                                                 | BGI                |
| <i>Oryza sativa</i><br>(subsp. <i>japonica</i> ) | <i>Orysa</i> ;KRP1      | DQ229362, AK103084                                                                                         | NCBI <sup>9</sup>  |
|                                                  | <i>Orysa</i> ;KRP2      | DQ229363                                                                                                   | NCBI <sup>9</sup>  |
|                                                  | <i>Orysa</i> ;KRP3      | DQ229364                                                                                                   | NCBI <sup>9</sup>  |
|                                                  | <i>Orysa</i> ;KRP4      | AAG16867                                                                                                   | NCBI <sup>9</sup>  |
|                                                  | <i>Orysa</i> ;KRP5      | DQ229366, AK064723                                                                                         | NCBI <sup>9</sup>  |
|                                                  | <i>Orysa</i> ;KRP6      | AK063208, BI306406                                                                                         | PGDB               |
| <i>Petunia hybrida</i>                           | <i>Pethy</i> ;EST884434 | CV296057, EST884434                                                                                        | TIGR               |
| <i>Phaseolus vulgaris</i>                        | <i>Phavu</i> ;BQ481784  | BQ481784                                                                                                   | TIGR               |
| <i>Pisum sativum</i>                             | <i>Pissa</i> ;CKI       | Q9FS28                                                                                                     | TAIR               |
| <i>Picea glabra</i>                              | <i>Picgl</i> ;TC9046    | TC9046                                                                                                     | TIGR               |
| <i>Pinus taeda</i>                               | <i>Pinta</i> ;TC61074   | TC61074                                                                                                    | TIGR               |
| <i>Poncirus trifoliata</i>                       | <i>Pontr</i> ;CD574460  | CD574460                                                                                                   | PGDB               |
| <i>Populus sp</i>                                | <i>Pop</i> ;TC37787     | TC37787, TC8233                                                                                            | TIGR               |
|                                                  | <i>Pop</i> ;TC23987     | TC23987, TC10401                                                                                           | TIGR               |
| <i>Populus deltoides</i>                         | <i>Popde</i> ;TC22599   | TC22599                                                                                                    | TIGR               |
| <i>Populus petioles</i>                          | <b>Popou</b> ;TC43100   | TC43100, CA823704                                                                                          | TIGR               |
| <i>Populus tremula</i>                           | <b>Poptr</b> ;TC41878   | TC41878, TC11798                                                                                           | TIGR               |
| <i>Populus trichocarpa</i>                       | <i>Poptr</i> ;ICK1      | DT473677, CV227354                                                                                         | PGR                |
|                                                  | <b>Poptr</b> ;ICK2      | CV256047                                                                                                   | PGR                |
|                                                  | <i>Poptr</i> ;ICK3      | CK106261                                                                                                   | PGR                |
|                                                  | <i>Poptr</i> ;ICK4      | DN496580                                                                                                   | PGR                |
|                                                  | <i>Poptr</i> ;ICK5      | TC413221, DT481699                                                                                         | PGR                |
|                                                  | <i>Poptr</i> ;ICK6      | CV229566                                                                                                   | PGR                |
|                                                  | <b>Poptr</b> ;ICK7      | CV240489                                                                                                   | PGR                |
|                                                  |                         |                                                                                                            |                    |
| <i>Saccharum officinarum</i>                     | <i>Sacof</i> ;CA111761  | CA111761                                                                                                   | PGDB               |
|                                                  | <i>Sacof</i> ;CA113287  | CA113287                                                                                                   | PGDB               |
| <i>Solanum tuberosum</i>                         | <i>Soltu</i> ;TC129555  | TC129555, TC110095, TC48670, TC72539, TC90224                                                              | TIGR               |
|                                                  | <i>Soltu</i> ;TC126156  | TC126156, TC102513, TC53536, TC57940, TC83785                                                              | TIGR               |
|                                                  | <b>Soltu</b> ;TC114843  | TC114843                                                                                                   | TIGR               |
|                                                  | <i>Soltu</i> ;CV492391  | CV492391                                                                                                   | TIGR               |
| <i>Sorghum bicolor</i>                           | <i>Sorbi</i> ;TC105178  | TC105178, TC62225, TC63254, TC88077, TC90296                                                               | TIGR               |
|                                                  | <i>Sorbi</i> ;TC106554  | TC106554                                                                                                   | TIGR               |
|                                                  | <i>Sorbi</i> ;BG240420  | BG240420                                                                                                   | TIGR               |
| <i>Taraxacum kok-saghyz</i>                      | <i>Tarko</i> ;DR402922  | DR402922                                                                                                   | PGDB               |
| <i>Triticum aestivum</i>                         | <i>Triae</i> ;TC255455  | TC255455, TC111262, TC176677, TC211160, TC37210, TC54255, TC72546, TC9630                                  | TIGR               |
|                                                  | <i>Triae</i> ;TC257918  | FGAS025551, CK213642                                                                                       | TIGR               |
| <i>Viti vitifera</i>                             | <i>Vitvi</i> ;TC39855   | TC39855, TC10752, TC14919, TC1742, TC26537                                                                 | TIGR               |
| <i>Vitis riparia</i>                             | <i>Vitri</i> ;CO408372  | CO408372                                                                                                   | PGDB               |
| <i>Zea mays</i>                                  | <i>Zeama</i> ;KRP1      | AY986792, TC288918, TC288919                                                                               | NCBI <sup>10</sup> |
|                                                  | <i>Zeama</i> ;KRP2      | AY986793, TC297785, TC292375                                                                               | NCBI <sup>10</sup> |
|                                                  | <i>Zeama</i> ;TC306014  | TC306014, TC215773, TC229055, TC276934                                                                     | TIGR               |
|                                                  | <i>Zeama</i> ;KRP3      | TC306015, TC175313                                                                                         | TIGR               |
|                                                  | <i>Zeama</i> ;TC292391  | TC292391, TC109503, TC122803, TC143223, TC163784, TC185468, TC197994, TC225705, TC263080, TC63242, TC87895 | TIGR               |
|                                                  | <i>Zeama</i> ;CF636654  | CF636654, TC295510                                                                                         | TIGR               |
|                                                  | <i>Zeama</i> ;KRP4      | TC301833                                                                                                   | TIGR               |

<sup>a</sup> Sequences in bold font were manually corrected (see sequences listed below). The original sequences all had a frame shift error.

<sup>b</sup> **TAIR** - The Arabidopsis Information Resource (<http://www.arabidopsis.org/wublast/index2.jsp>), **TIGR** - The Institute for Genomic Research (<http://tigrblast.tigr.org/tgi/>), **PGDB** - Plant Genome DataBase (<http://www.plantgdb.org/PlantGDB-cgi/blast/index.cgi>), **NCBI** - National Center for Biotechnology Information (<http://www.ncbi.nlm.nih.gov/entrez/>), and **PGR** - Populus genome release 1.1 ([http://genome.jgi-psf.org/Poptr1\\_1/Poptr1\\_1.home.html](http://genome.jgi-psf.org/Poptr1_1/Poptr1_1.home.html)). **References:** <sup>1</sup> Wang *et al.* (1997); <sup>2</sup> Lui *et al.* (2000); <sup>3</sup> De Veylder *et al.* (2001); <sup>4</sup> Brachypodium distachyon project (<http://mips.helmholtz-muenchen.de/plant/brachypodium/>); <sup>5</sup> Bisbis *et al.* (2006); <sup>6</sup> Pettko-Szandtner *et al.* (2006); <sup>7</sup> Jasinski *et al.* (2002b); <sup>8</sup> Jasinski *et al.* (2002a); <sup>9</sup> Barroco *et al.* (2006); and <sup>10</sup> Coelho *et al.* (2005).

### Notes on variation in some ICK/KRP data from Arabidopsis, rice and poplar

The rice accessions Os06g11050 and BAD35196 are related to the accession DQ229363 of *Oryza;KRP2* reported by Barroso *et al.* (2006), but they encode longer polypeptides (extended beyond the C-terminus of the DQ229363 by 410 and 468 amino acids respectively). For BAD35196, the extra sequence following the C-terminus of *Oryza;KRP2* is similar, oddly, to a cellulose synthase-like domain unrelated to the cell cycle. *Oryza;KRP4* has a related accession (AAG16867) which encodes for a polypeptide of 242 amino acids (the corresponding cDNA sequence information was not available). *Arabidopsis;KRP4* has two accessions (At2g32710.1 and At2g32710.2) supported by cDNAs. Further examination of the annotation information indicated that the mRNA of At2g32710.1 comes from Ws/Ler ecotype and thus this sequence is a polymorphic variant of the At2g32710.2 from the 'Columbia' ecotype. Finally Poptr:ICK2 and Poptr:ICK5 (Accessions GRAIL3.0019007301 and eugene3.00012276, respectively) are sequences obtained from the JGI genome assembly v1.1 and were manually corrected based on EST sequence information (data not shown).

### Sequences manually corrected

>Medtr;CB894939

MGKYMKKLKSSESPSPNSTPITNSPPTPITITNSPPATTPNSSDGVITR  
ARTLAFENSNNQNLVSVSSDYLQLRNRRLKRPLLRQHSKRNRKGNDS  
PKSPIGNSTAEKTVQKSPENAEFGVNAEDAERSARETTPVHLIMRSD  
VLRPPRSITKRTFSTEANPRTEQPTIPIISPEFEEYFAKHEAEQQREFMEK  
YNFDPVTEQPLPGRFEWEKVP\*

>Gosar;TC36522

MKSKITGDVAVMEVSHRSTMSRTRAAKTLALQRLSKTTQVTQVVGSNQD  
VSSLSYLQLRNRRLKELASPVSSKTKHTQEEKESGFREEEGKNGGKKNK  
GCFGNREIVLEVGICCGTEQAMDFELRDRSTPCSLTKDLKTIPSPGLVND  
VLQSVSPSTQEMEEFFVYAEQQQHRRFIEKYNFDIVNDLPLQGRYDVKIIP\*

>Soltu;TC114843

MGKYIRKARKTEDVSPGLVTRAKALALNGGDGGSYLELRSRRLVKPFAV  
LEGRRQKNGVPKNPVNPVNPQIPNVCVNSEEGKGVKEMENQKEKEKSC  
LGPEDSFGEKLLFEFGRKRTTRESTPCSLIRSDNIQTPGSSTRRTNANE  
ANGRVVNSIQPNIPDLEIDEFFTRAEKEQQRKFKIEKYNFDPVNDKPLPG  
RYEWLKVYSL\*

>Poptr;TC41878

MGKYMRKSKITSDVVAVMEVTSGVRTRAKTHALQLLQSPVSSNLDAPPPV  
TSSXGAAALKNQRHSSMLKPKGTTKEKDTFSCKGASRLRVNSSTTGDCD  
EKGTGKLGFKCETEDSGSLKEASSGDNCFDFERCTRESTPCSLIRSDENH  
SKTRVQPQDRESSNCGQPETLEHAEKYPDNMEMDEFFAGVEQQQQLFIE  
KYNFDIVNDLPLSGRYEWRVIP\*

>Popeu;TC43100

MVKAQVGVKTRTRATRKRSRHIKISIKVRSNVTSSRQERVIIIRS  
DNSVSYPLDVSSGQRMVTEERCSSPSLDDDFDDNHSLSMSSTSCFSSNGSC  
DEIIKFTDLEERVEVETSMYSSRREREKTPSSALREESMSENMDST  
ATPAPLKKPNSHRRSTAAVIRITDEEVEKFFCEIEKTVPQRFKDKYNFD  
FDKDEALEGRYEWVRLNP\*

>Agrca;DV852835

MAATAAAATAAVKAVSSSCSKRESNIAVAADLPKKAKKGRAPPPEEVEAF  
FAAAESGVARRFAAKYNYDVVEDAPMDGRYEWVVRP\*

>Poptr;ICK2

MVKAPPPPPAAQVGKTRTRATKKRSRHIKISIKVRSNVTSSRQERVII  
RSDNSASYPLDVNSGHRMVTTEERCSSPSLDDDFEDNHSLSSTSCCSSNG  
SCDEIIKFTDLEEEERVEVETSMTYSSSREREKTPTSNALREESTSENMD  
STATPAPLKKPNSHRRSTAAAVIRITDEEVEKFFCEIEKTVPQRFKDKYN  
FDFDKDEALEGRYEWVRLNP\*

>Poptr;ICK5

MGKYMRKAKTTSDVAVMDLTHGVRTRARTLALKKQGVKASPPSSPAGYL  
QLRSRLEKKPPPIPSLHHDSRRQHHRQGGQNSKLGQQQQEVEEIPS  
PNLKSSSGSQEKERGESKVDREVEENNSNSKDLGSFGDNVLDIEGRD  
RSTRESTPCNLTRGTEDARTPGSTTKPANPTESSRRLHNSTRRHIPTAHE  
MDEFFGPAEEEEQLRQFTEKYNFDPVSDKPLHGRYEWKLDLDR\*
