# Supplementary material
Source: PubMed Central journal article supplement (PMC3091803)
Supplement: supp_mcr034_mcr034supp_table3.pdf [file supp_mcr034_mcr034supp_table3.pdf]

## SUPPLEMENTARY DATA

TABLE S3. Information on the individual microarray slides used in the analysis to produce Fig. 5A in the main text

| Experiment name <sup>1</sup>                                                    | Slides <sup>2</sup>                                                                                                                                                                                                                                                                                                                                                                                                                                                                                                                                                                                                                                                                                                                                                                                                                                                                                                 |
|---------------------------------------------------------------------------------|---------------------------------------------------------------------------------------------------------------------------------------------------------------------------------------------------------------------------------------------------------------------------------------------------------------------------------------------------------------------------------------------------------------------------------------------------------------------------------------------------------------------------------------------------------------------------------------------------------------------------------------------------------------------------------------------------------------------------------------------------------------------------------------------------------------------------------------------------------------------------------------------------------------------|
| <b>Roots<sup>A,B</sup></b>                                                      |                                                                                                                                                                                                                                                                                                                                                                                                                                                                                                                                                                                                                                                                                                                                                                                                                                                                                                                     |
| A gene expression map of the Arabidopsis root (NASCARRAYS-367)                  | Birnbaum_1-1_src5-1_Rep1_ATH1, Birnbaum_1-2_src5-2_Rep2_ATH1, Birnbaum_1-3_src5-3_Rep3_ATH1, Birnbaum_1-16_wol-1_Rep1_ATH1, Birnbaum_1-17_wol-2_Rep2_ATH1, Birnbaum_1-18_wol-3_Rep3_ATH1, Birnbaum_1-19_LRC-1_Rep1_ATH1, Birnbaum_1-20_LRC-2_Rep2_ATH1, Birnbaum_1-21_LRC-3_Rep3_ATH1, Birnbaum_1-22_gl2-1_Rep1_ATH1, Birnbaum_1-23_gl2-2_Rep2_ATH1, Birnbaum_1-24_gl2-3_Rep3_ATH1, Birnbaum_1-25_J0571-1_Rep1_ATH1, Birnbaum_1-26_J0571-2_Rep2_ATH1, Birnbaum_1-27_J0571-3_Rep3_ATH1, Birnbaum_1-4_Stagel-1_Rep1_ATH1, Birnbaum_1-5_Stagel-2_Rep2_ATH1, Birnbaum_1-6_Stagel-3_Rep3_ATH1, Birnbaum_1-7_Stagel-4_Rep4_ATH1, Birnbaum_1-8_Stagell-1_Rep1_ATH1, Birnbaum_1-9_Stagell-2_Rep2_ATH1, Birnbaum_1-10_Stagell-3_Rep3_ATH1, Birnbaum_1-11_Stagell-4_Rep4_ATH1, Birnbaum_1-12_Stagell-1_Rep1_ATH1, Birnbaum_1-13_Stagell-2_Rep2_ATH1, Birnbaum_1-14_Stagell-3_Rep3_ATH1, and Birnbaum_1-15_Stagell-4_Rep4_ATH1 |
| AtGenExpress: Developmental series (roots)(NASCARRAYS-151)                      | ATGE_3 A-C, ATGE_9 A-C, ATGE_93 A-C, ATGE_94 A-C, ATGE_95 A-C, ATGE_98 A-C and ATGE_99 A-C                                                                                                                                                                                                                                                                                                                                                                                                                                                                                                                                                                                                                                                                                                                                                                                                                          |
| <b>Seedlings<sup>A</sup></b>                                                    |                                                                                                                                                                                                                                                                                                                                                                                                                                                                                                                                                                                                                                                                                                                                                                                                                                                                                                                     |
| AtGenExpress: Developmental series (seedlings and whole plants)(NASCARRAYS-149) | ATGE_1 A-C, ATGE_2 A-C, ATGE_7 A-C, ATGE_96 A-C, ATGE_97 A-C, ATGE_100 A-C, and ATGE_101 A-C                                                                                                                                                                                                                                                                                                                                                                                                                                                                                                                                                                                                                                                                                                                                                                                                                        |
| <b>Leaves<sup>A</sup></b>                                                       |                                                                                                                                                                                                                                                                                                                                                                                                                                                                                                                                                                                                                                                                                                                                                                                                                                                                                                                     |
| AtGenExpress: Developmental series (leaves)(NASCARRAYS-150)                     | ATGE_5 A-C, ATGE_10 A-C, ATGE_12 A-C, ATGE_13 A-C, ATGE_14 A-C, ATGE_15 A-C, ATGE_16 A-C, ATGE_17 A-C, ATGE_19 A-C, ATGE_20 A-C, ATGE_21 A-C, ATGE_22 A-C, ATGE_23 A-C, ATGE_24 A-C, ATGE_26 A-C, ATGE_87 A-C, ATGE_89 A-C, ATGE_90 A-C and ATGE_91 A-C                                                                                                                                                                                                                                                                                                                                                                                                                                                                                                                                                                                                                                                             |
| <b>Senescing leaves<sup>A</sup></b>                                             |                                                                                                                                                                                                                                                                                                                                                                                                                                                                                                                                                                                                                                                                                                                                                                                                                                                                                                                     |
| AtGenExpress: Developmental series (leaves)(NASCARRAYS-150)                     | ATGE_25 A-C                                                                                                                                                                                                                                                                                                                                                                                                                                                                                                                                                                                                                                                                                                                                                                                                                                                                                                         |
| <b>Shoot apex<sup>A</sup></b>                                                   |                                                                                                                                                                                                                                                                                                                                                                                                                                                                                                                                                                                                                                                                                                                                                                                                                                                                                                                     |
| AtGenExpress: Developmental series (shoots and stems)(NASCARRAYS-153)           | ATGE_4 A-C, ATGE_6 A-C, ATGE_8 A-C and ATGE_29 A-C                                                                                                                                                                                                                                                                                                                                                                                                                                                                                                                                                                                                                                                                                                                                                                                                                                                                  |
| <b>Stems<sup>A</sup></b>                                                        |                                                                                                                                                                                                                                                                                                                                                                                                                                                                                                                                                                                                                                                                                                                                                                                                                                                                                                                     |
| AtGenExpress: Developmental series (shoots and stems)(NASCARRAYS-153)           | ATGE_27 A-C and ATGE_28 A-C                                                                                                                                                                                                                                                                                                                                                                                                                                                                                                                                                                                                                                                                                                                                                                                                                                                                                         |
| <b>Flowering induction<sup>C</sup></b>                                          |                                                                                                                                                                                                                                                                                                                                                                                                                                                                                                                                                                                                                                                                                                                                                                                                                                                                                                                     |
| AtGenExpress: Developmental series (mutants and other ecotypes)(NASCARRAYS-155) | Col-0_0_1, Col-0_0_2, Col-0_3_1, Col-0_3_2, Col-0_5_1, Col-0_5_2, Col-0_7_1, Col-0_7_2                                                                                                                                                                                                                                                                                                                                                                                                                                                                                                                                                                                                                                                                                                                                                                                                                              |
| <b>Flowers<sup>A</sup></b>                                                      |                                                                                                                                                                                                                                                                                                                                                                                                                                                                                                                                                                                                                                                                                                                                                                                                                                                                                                                     |
| AtGenExpress: Developmental series (flowers and pollen) (NASCARRAYS-152)        | Whole flower ATGE_31 A-C, ATGE_32 A-C, ATGE_33 A-C, and ATGE_39 A-C), Sepals (ATGE_34 A-C and ATGE_41 A-C), Petals (ATGE_35 A-C and ATGE_42 A-C), Stamens (ATGE_36 A-C and ATGE_43 A-C) and Carpels (ATGE_37 A-C and ATGE_45 A-C)                                                                                                                                                                                                                                                                                                                                                                                                                                                                                                                                                                                                                                                                                   |
| <b>Pollen development<sup>A,D</sup></b>                                         |                                                                                                                                                                                                                                                                                                                                                                                                                                                                                                                                                                                                                                                                                                                                                                                                                                                                                                                     |
| Transcriptome analysis of Arabidopsis microgametogenesis (NASCARRAYS-48)        | Honys_UNM1_SLD, Honys_UNM2_SLD, Honys_BCP1_SLD, Honys_BCP2_SLD, Honys_TCP1_SLD, Honys_TCP2_SLD and Honys_MPG1_SLD                                                                                                                                                                                                                                                                                                                                                                                                                                                                                                                                                                                                                                                                                                                                                                                                   |
| AtGenExpress: Developmental series (flowers and pollen) (NASCARRAYS-152)        | ATGE_73 A-C                                                                                                                                                                                                                                                                                                                                                                                                                                                                                                                                                                                                                                                                                                                                                                                                                                                                                                         |
| <b>Siliques<sup>A</sup></b>                                                     |                                                                                                                                                                                                                                                                                                                                                                                                                                                                                                                                                                                                                                                                                                                                                                                                                                                                                                                     |
| Developmental series (siliques and seeds) (NASCARRAYS-154)                      | ATGE_76 A-C, ATGE_77 A-C and ATGE_78 A-C                                                                                                                                                                                                                                                                                                                                                                                                                                                                                                                                                                                                                                                                                                                                                                                                                                                                            |
| <b>Seeds development<sup>A</sup></b>                                            |                                                                                                                                                                                                                                                                                                                                                                                                                                                                                                                                                                                                                                                                                                                                                                                                                                                                                                                     |
| Developmental series (siliques and seeds) (NASCARRAYS-154)                      | ATGE_79 A-C, ATGE_81 A-C, ATGE_82 A-C, ATGE_83 A-C and ATGE_84 A-C                                                                                                                                                                                                                                                                                                                                                                                                                                                                                                                                                                                                                                                                                                                                                                                                                                                  |
| <b>Seed germination<sup>E</sup></b>                                             |                                                                                                                                                                                                                                                                                                                                                                                                                                                                                                                                                                                                                                                                                                                                                                                                                                                                                                                     |
| AtGenExpress: Expression profiling of early germinating seeds (NASCARRAYS-195)  | RIKEN-PRESTON0A, RIKEN-PRESTON0B, RIKEN-PRESTON1A, RIKEN-PRESTON1B, RIKEN-PRESTON2A and RIKEN-PRESTON2B                                                                                                                                                                                                                                                                                                                                                                                                                                                                                                                                                                                                                                                                                                                                                                                                             |

<sup>1</sup> The names are the same as they appear in the NASC's International Affymetrix Service (<http://affymetrix.arabidopsis.info/>).

<sup>2</sup> Sources of the microarrays are noted as the following:

<sup>A</sup> AtgenExpress developmental series (<http://www.weigelworld.org/resources/microarray/AtGenExpress/>) (183 slides) (Schmid *et al.*, 2005);

<sup>B</sup> Src - endodermis, wol - stele, LRC - lateral root cap, gl2 – atrichoblasts, and J0571 - endodermis and cortex (15 slides) are from “Transcriptional profile of the Arabidopsis root quiescent center” (annotations according to Nawy *et al.*, 2005) and Stagel - stage 1, Stagell - stage 2, and Stagelll - stage 3 (12 slides) are from “*in situ* digital hybridization in root” (annotations according to Birnbaum *et al.*, 2003).

<sup>C</sup> Data for 0D, 3D, 5D and 7D (Days) treatments after plants were transferred from short-day (9 hours light, 15 hours dark) to long-day (16 hours light, 8 hours dark) conditions (8 slides) are from “Global expression analysis of floral induction” (Schmid *et al.*, 2003);

<sup>D</sup> UNM; uninuclear microspores, BCP; bicellular pollen, TCP; tricellular pollen and MPG; mature pollen (7 slides) are from “Transcriptome analysis of Arabidopsis microgametogenesis” (Honys and Twell, 2004); and

<sup>E</sup> 0hr, 1hr and 3hr (hour) after seed stratification (6 slides) are from “Expression profiling of early germinating seeds” (<http://affymetrix.arabidopsis.info/narrays/experimentpage.pl?experimentid=195>).
