# Supplementary material
Source: PubMed Central journal article supplement (PMC3091803)
Supplement: supp_mcr034_mcr034supp_table7.pdf [file supp_mcr034_mcr034supp_table7.pdf]

SUPPLEMENTARY DATA

TABLE S7. Summary of information on *Arabidopsis*, rice and poplar ICK/KRP genes and predicted proteins

| Name                               | GI <sup>a</sup> | Chromosome Position <sup>b</sup><br>(BAC accessions) | Protein size<br>(aa) | Mw (kDa) <sup>c</sup> | IP <sup>c</sup> |
|------------------------------------|-----------------|------------------------------------------------------|----------------------|-----------------------|-----------------|
| <i>Arath;ICK1/KRP1</i>             | At2g23430       | 9984100-9985001<br>(NC_003071)                       | 191                  | 22.282                | 5.29            |
| <i>Arath;ICK2/KRP2</i>             | At3g50630       | 18811489-18812347<br>(NC_003074)                     | 209                  | 24.036                | 4.73            |
| <i>Arath;ICK3/KRP5</i>             | At3g24810       | 9060997-9061749<br>(NC_003074)                       | 189                  | 21.424                | 9.46            |
| <i>Arath;ICK4/KRP6<sup>d</sup></i> | At3g19150       | 6616358 – 6617702<br>(NC_003074)                     | 196                  | 21.454                | 4.52            |
| <i>Arath;ICK5/KRP7</i>             | At1g49620       | 18369359-18370227<br>(NC_003070)                     | 195                  | 21.964                | 4.65            |
| <i>Arath;ICK6/KRP3</i>             | At5g48820       | 19809834-19811572<br>(NC_003076)                     | 222                  | 24.924                | 7.60            |
| <i>Arath;ICK7/KRP4<sup>e</sup></i> | At2g32710       | 13880573-13882427<br>(NC_003071)                     | 289                  | 32.067                | 9.61            |
| <i>Orysa;KRP1</i>                  | Os02g52480      | 32129863-32131024<br>(AP008208)                      | 262                  | 27.138                | 10.00           |
| <i>Orysa;KRP2<sup>f</sup></i>      | Os06g11050      | 5806627-5805555<br>(AP008212)                        | 249                  | 25.668                | 6.24            |
| <i>Orysa;KRP3</i>                  | Os11g40030      | 23012139-23013872<br>(AP008217)                      | 225                  | 23.719                | 9.94            |
| <i>Orysa;KRP4<sup>g</sup></i>      | Os10g33310      | 16988093-16985195<br>(AP008216)                      | 194                  | 21.308                | 8.86            |
| <i>Orysa;KRP5</i>                  | Os03g04490      | 2070547-2073133<br>(AP008209)                        | 221                  | 24.177                | 6.77            |

|                   |                                      |                                  |     |        |      |
|-------------------|--------------------------------------|----------------------------------|-----|--------|------|
| <i>Orysa;KRP6</i> | Os09g28580                           | 17337828-17336561<br>(AP008215)  | 86  | 9.274  | 8.66 |
| <i>Poptr;ICK1</i> | estExt_fgenesh4_pg.C<br>_LG_V0508    | 4746516-4747551<br>(NC_008471)   | 223 | 25.163 | 4.91 |
| <i>Poptr;ICK2</i> | GRAIL3.0019007301                    | 9127116-9128223<br>(NC_008473)   | 220 | 25.087 | 6.47 |
| <i>Poptr;ICK3</i> | eugene3.00002475                     | 22645741-22648322<br>(NC_008468) | 223 | 24.851 | 8.90 |
| <i>Poptr;ICK4</i> | fgenesh4_pg.C_scaffo<br>Id_130000050 | NW_001492739 <sup>h</sup>        | 207 | 22.996 | 5.11 |
| <i>Poptr;ICK5</i> | estExt_fgenesh4_pg.C<br>_LG_IX0597   | 3819120-3820604<br>(NC_008475)   | 206 | 23.119 | 6.84 |
| <i>Poptr;ICK6</i> | eugene3.00170155                     | 1582673-1585653<br>(NC_008483)   | 244 | 27.330 | 9.54 |
| <i>Poptr;ICK7</i> | eugene3.00012276                     | 25443779-25446939<br>(NC_008467) | 241 | 27.233 | 9.40 |

<sup>a</sup> Gene Identifiers for Arabidopsis, rice and poplar are according to AGI code for Arabidopsis (the Arabidopsis information resource: <http://www.arabidopsis.org/index.jsp>), TIGR V4 pseudo-molecules annotation for rice (TIGR Rice Genome Annotation: <http://www.tigr.org/tdb/e2k1/osa1/index.shtml>), and *Populus trichocarpa* JGI genome assembly v1.1 (Populus genome release 1.1: [http://genome.jgi-psf.org:8080/annotator/servlet/jgi.annotation.Annotation?pDb=Poptr1\\_1](http://genome.jgi-psf.org:8080/annotator/servlet/jgi.annotation.Annotation?pDb=Poptr1_1)), respectively..

<sup>b</sup> Chromosome positions of the *ICK/KRP* genes from Arabidopsis, *O. sativa* subsp. *Japonica* and *Populus trichocarpa*.

<sup>c</sup> Predicted amino acid (aa) sequences were used to calculate the molecular mass (Mw) and theoretical isoelectric point (pI) with the ExPASy Proteomics Compute tool available from: [http://ca.expasy.org/tools/pi\\_tool.html](http://ca.expasy.org/tools/pi_tool.html); kDa - kiloDaltons.

<sup>d</sup> It has a splicing variant not described here: At3g19150.2 (*Arath:KRP6.2*) NP\_974338 (176 aa, pI/Mw: 4.54 / 18.929 kDa). Information in the table corresponds to At3g19150.1 (*Arath:KRP6.1*).

<sup>e</sup> At2g32710 has two polymorphic variants which we believe are miss-annotated as splicing variants: At2g32710.1 (870 bp) and At2g32710.2 (861 bp). At2g32710.1 is a cDNA (accessions: DR354760 and AY087958) from WS/Ler ecotypes while At2g32710.2 (accessions: AU238423, AK117586, and BX835336) is from Col-0 and therefore used in this study.

<sup>f</sup> The original accession (Os06g11050) encodes a polypeptide of 410 aa which is not supported by the cDNA sequence. In this study we used a cDNA clone (DQ229363) for the analysis.

<sup>g</sup> There is another accession AAG16867 (242 aa,pI/Mw: 9.16 / 26.750 kDa) for the *Orysa:KRP4* (Os10g33310), but there is no

information on cDNA yet.

<sup>h</sup> *Populus trichocarpa* genomic scaffold "scaffold\_130".
